# Supplementary material for: Non Linear Strain Measures on Concrete Structures by Means of Embedded Optical Fiber Sensors
Source: Preprints.org preprint supplement (doi:10.20944/preprints201807.0331.v2), 2018-10-06
Supplement: Supplementary file 1 [file supplementary]

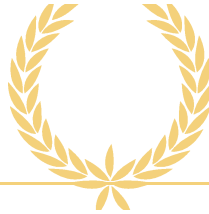

We certify that the following article

## Non Linear Strain Measures on Concrete Structures by means of Embedded Optical Fiber Sensors

Vincenzo Minutolo \*, Renato Zona

has undergone English language editing by MDPI. The text has been checked for correct use of grammar and common technical terms, and edited to a level suitable for reporting research in a scholarly journal.

MDPI uses experienced, native English speaking editors. Full details of the editing service can be found at

► [www.mdpi.com/authors/english](http://www.mdpi.com/authors/english).

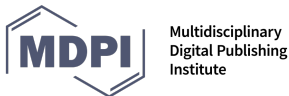

Basel, September 2018

Martyn Rittman, Ph.D.  
English Editing Manager  
[englishediting@mdpi.com](mailto:englishediting@mdpi.com)  
<http://www.mdpi.com/authors/english>
